# Supplementary material for: Effects of irrigation and nitrogen management on phyllosphere microbial communities of silage maize
Source: PeerJ journal article supplement (doi:10.7717/peerj.19663), 2025-07-31
Supplement: Table_S1.docx [file Table_S1.docx]

| Treatment | | Plant height (m) | Stem thick (cm) | Per plant fresh matter yield (kg) | | | |
| --- | --- | --- | --- | --- | --- | --- | --- |
| Leaf | Stem | Ear | Whole-crop |
| Irrigation amount (IA) | IA1200 | 2.16±0.07 | 27.1±0.01b | 0.25±0.03 | 1.71±0.10b | 0.77±0.04b | 2.73±0.14b |
| IA2400 | 2.33±0.07 | 30.4±0.01a | 0.31±0.01 | 2.02±0.10a | 0.89±0.03a | 3.22±0.14a |
| N application rate (NAR) | Low | 2.15±0.07b | 28.2±0.02 | 0.24±0.03b | 1.65±0.08b | 0.76±0.02b | 2.65±0.12b |
| Medium | 2.44±0.08a | 29.1±0.01 | 0.33±0.03a | 2.10±0.11a | 0.94±0.04a | 3.37±0.14a |
| High | 2.15±0.07b | 28.4±0.01 | 0.27±0.02ab | 1.86±0.15ab | 0.80±0.05b | 2.93±0.20ab |
| *P* value | IA | NS | * | NS | * | * | * |
| NAR | * | NS | * | * | * | * |
| IA×NAR | NS | NS | NS | NS | NS | NS |
| Standard error of the means | | 0.05 | 0.01 | 0.02 | 0.08 | 0.03 | 0.11 |
